# Supplementary material for: Escherichia coli proteins uL29 and ACP stabilize the Tn7-encoded TnsD and its DNA binding
Source: Research Square preprint supplement (doi:10.21203/rs.3.rs-7151933/v1), 2025-08-01
Supplement: Supplementary file 1 [file 877712bb6338229d19140369.pdf]

**Supplementary Material:**

***Escherichia coli* proteins uL29 and ACP stabilize the Tn7-encoded TnsD and its DNA binding**

Shani B. Leyva Camacho<sup>1,2</sup>, Lindsay A. Matthews<sup>1,2</sup>, A. Guarné<sup>1,2,3</sup>

**Figure S1.** Available structures for TnsD complexes.

**Figure S2.** Characterization of apo and holo ACP.

**Figure S3.** Comparison of AlphaFold predictions for TnsD.

**Figure S4.** ACP<sup>D39R/E42A</sup> exists in its apo- and holo- forms.

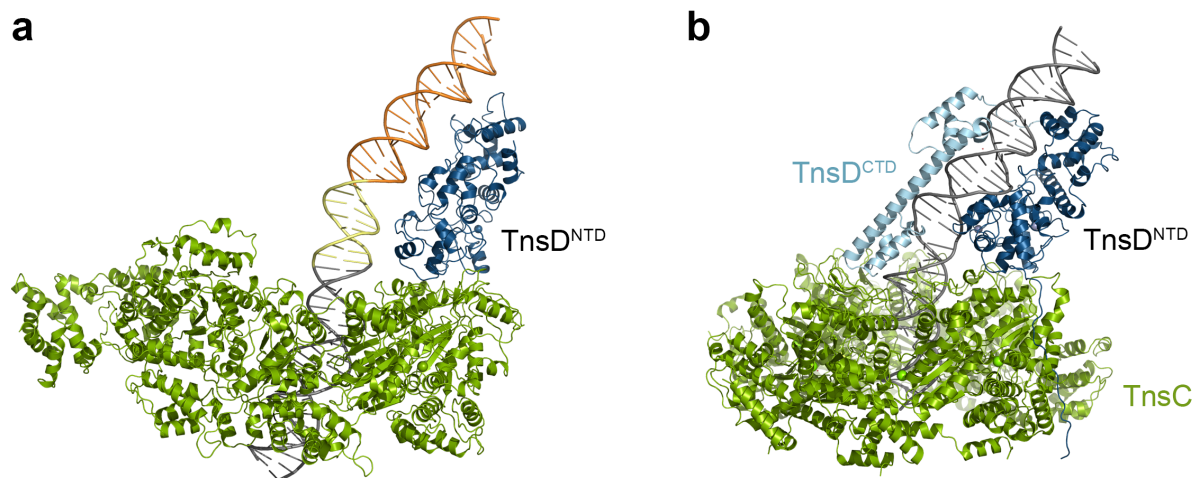

**Figure S1. Available structures for TnsD complexes.** (a) Cryo-EM reconstruction of TnsD<sup>NTD</sup>:TnsC:DNA complex from the Tn7 element[1]. TnsD and TnsC are colored dark blue and green, respectively. (b) Cryo-EM reconstruction of the TnsD-targeting complex from a I-B2 CAST element[2]. The C-terminal domain of TnsD is shown in light blue, and TnsD<sup>NTD</sup> and TnsC are shown as in (a).

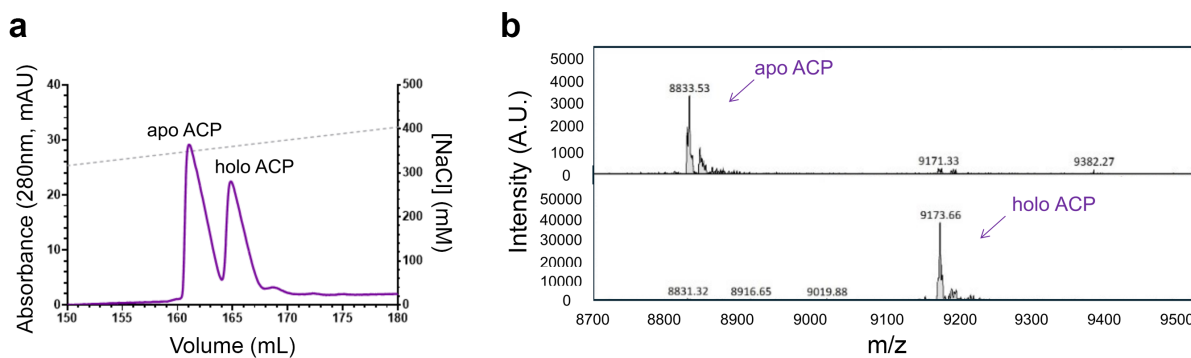

**Figure S2. Characterization of apo and holo ACP.** (a) Ionic exchange elution profile resolving the apo- and holo- forms of ACP. (b) ESI-Mass Spectrometry for apo (top) and holo (bottom) ACP. Molecular weights are reported in daltons, showing the expected 340.13 Da mass difference between the two forms.

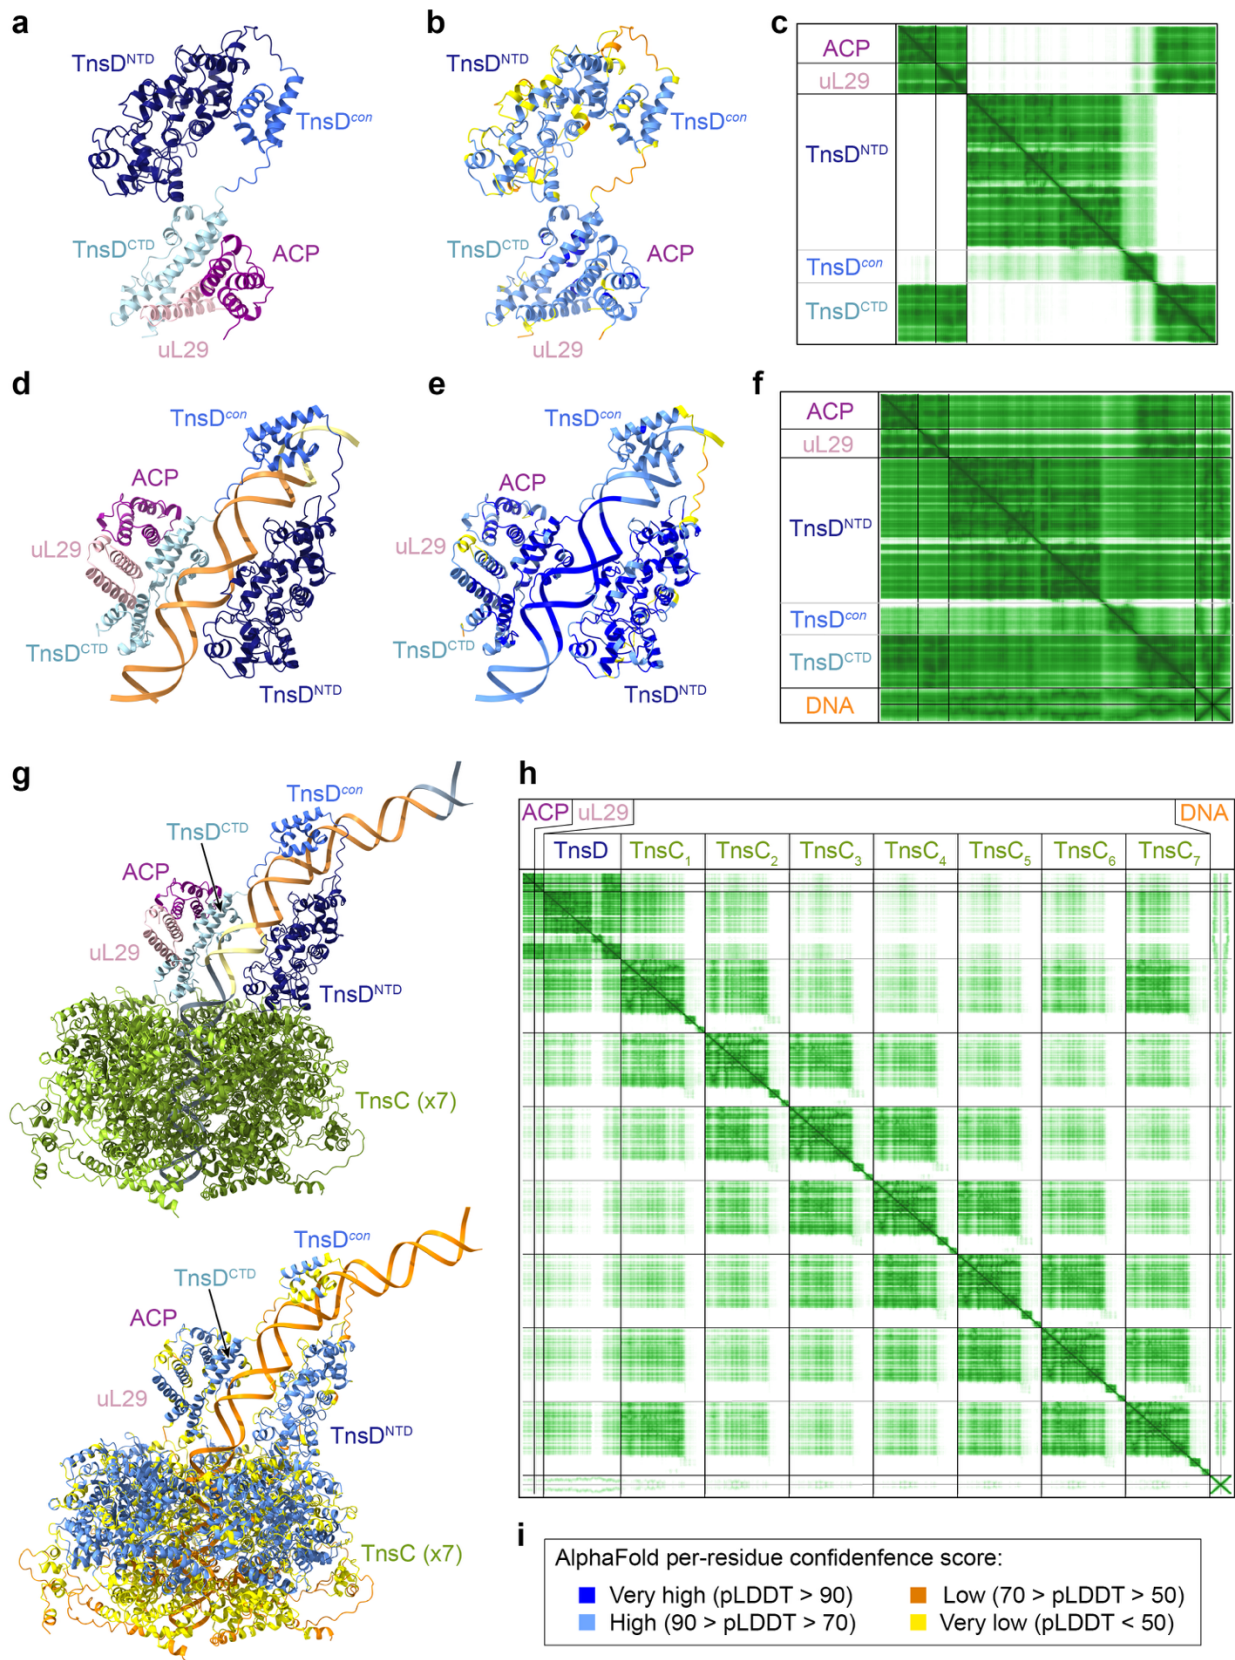

**Figure S3. Comparison of AlphaFold predictions for TnsD.** (a) Prediction of the Tn7 TnsD:ACP:uL29 complex in the absence of DNA. TnsD is shown in shades of blue, ACP in magenta, and uL29 in pink, and labeled. (b) Prediction of the Tn7 TnsD:ACP:uL29 complex in the absence of DNA colored based on the local confidence of the prediction as defined by AlphaFold. (c) Aligned Error (PAE) matrix for the TnsD:ACP:uL29 prediction. (d-e) Prediction of the TnsD:ACP:uL29 complex bound to the +23 to +58 fragment of *attTn7* site. Proteins are colored as in (a-b). In panel (d), DNA is color-coded based on high (orange) and low (yellow) protection upon binding as determined by Mitra *et al.*[3] (f) PAE matrix for the TnsD:ACP:uL29:DNA prediction. (g-h) Alphafold prediction of the Tn7 TnsD-mediated targeting complex colored as in (a-b) with TnsC shown in green (top) and based on the pLDDT (bottom). (i) PAE matrix for the TnsD:ACP:uL29:TnsC:DNA prediction. (j) Color-key for the local confidence scores (pLDDT) used in panels (b), (e), and (g).

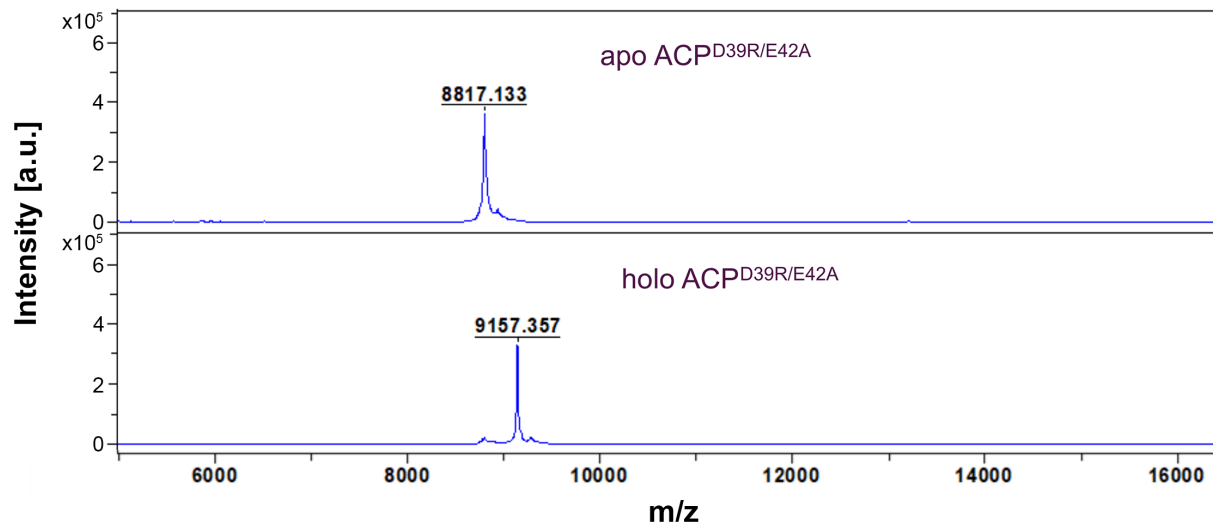

**Figure S4. ACP<sup>D39R/E42A</sup> exists in its apo- and holo- forms.** MALDI-Mass Spectrometry for apo (top) and holo (bottom) ACP<sup>D39R/E42A</sup> showing a 340.2 Da mass difference between the two forms.

1

2 **References:**

3

- 4 1. Shen, Y., et al., *Assembly of the Tn7 targeting complex by a regulated stepwise process.*  
5 *Mol Cell*, 2024. **84**(12): p. 2368-2381 e6.
- 6 2. Wang, S., et al., *Structure of TnsABCD transpososome reveals mechanisms of targeted*  
7 *DNA transposition.* *Cell*, 2024. **187**(24): p. 6865-6881 e16.
- 8 3. Mitra, R., et al., *Characterization of the TnsD-attTn7 complex that promotes site-specific*  
9 *insertion of Tn7.* *Mob DNA*, 2010. **1**(1): p. 18.

10
